# Supplementary material for: Zebrafish Embryo as an In Vivo Model for Behavioral and Pharmacological Characterization of Methylxanthine Drugs
Source: MDPI journal article supplement (doi:10.3390/ijms18030596), 2017-03-09
Supplement: s1 [file s1]

**Supplementary S4.** Specific endpoints with the corresponding timepoint and concentration at which they were first observed during the FET-test.

| Compound       | First Affected Endpoint      | Timepoint (hpf) | Concentration (mg/L) |
|----------------|------------------------------|-----------------|----------------------|
| Aminophylline  | Movement                     | 24              | 250                  |
| Caffeine       | Movement                     | 24              | 90                   |
| Diprophylline  | Heartbeat                    | 48              | 4000                 |
| Doxofylline    | Movement                     | 24              | 250                  |
| Etofylline     | Heartbeat; blood circulation | 48              | 200                  |
| IBMX           | Movement; detachment of tail | 24              | 50                   |
| Pentoxifylline | Movement                     | 24              | 100                  |
| Theobromine    | Heartbeat                    | 48              | 100                  |
| Theophylline   | Movement                     | 24              | 100                  |
